# Supplementary material for: A phylogenetic analysis of Bromus (Poaceae: Pooideae: Bromeae) based on nuclear ribosomal and plastid data, with a focus on Bromus sect. Bromus
Source: PeerJ journal article supplement (doi:10.7717/peerj.13884), 2022-09-28

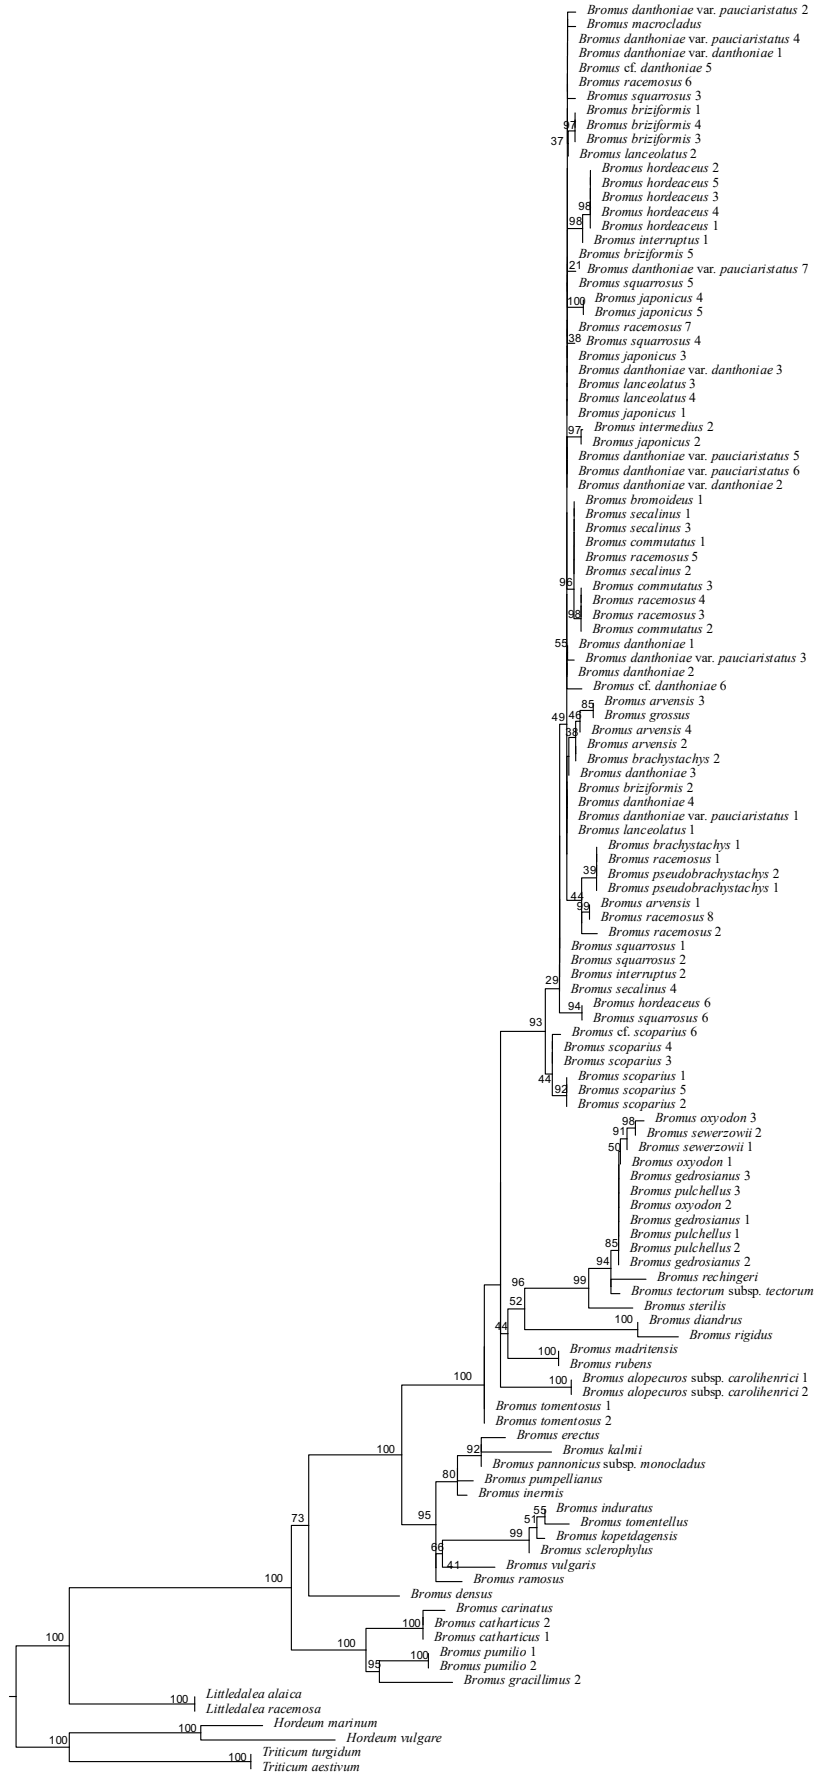

Supplement: Supplemental_Figure_S7.pdf [file Supplemental_Figure_S7.pdf]
